1 **Protection of grapevine pruning wounds against *Phaeomoniella***  
2 ***chlamydospora* and *Diplodia seriata* by biological and chemical**  
3 **methods**

4  
5  
6 **María del Pilar Martínez-Diz<sup>a,b</sup>, Emilia Díaz-Losada<sup>a</sup>, Ángela Díaz-Fernández<sup>a</sup>, Yolanda**  
7 **Bouzas-Cid<sup>a</sup>, David Gramaje<sup>c,\*</sup>**

8  
9  
10 <sup>a</sup>Estación de Viticultura e Enoloxía de Galicia (AGACAL-EVEGA), Ponte San Clodio s/n  
11 32428-Leiro-Ourense, Spain.

12 <sup>b</sup>Universidade da Coruña, Facultade de Ciencias, Zapateira, 15071 A Coruña, Spain.

13 <sup>c</sup>Instituto de Ciencias de la Vid y del Vino (ICVV), Consejo Superior de Investigaciones  
14 Científicas - Universidad de la Rioja - Gobierno de La Rioja, Ctra. LO-20 Salida 13, Finca La  
15 Grajera, 26071 Logroño, Spain.

16  
17  
18 \* Corresponding author. Instituto de Ciencias de la Vid y del Vino (ICVV), Consejo Superior  
19 de Investigaciones Científicas, Universidad de la Rioja, Gobierno de La Rioja, Ctra. LO-20  
20 Salida 13, 26007 Logroño, Spain.

21 E-mail address: [david.gramaje@icvv.es](mailto:david.gramaje@icvv.es) (D. Gramaje)

22  
23  
24  
25  
26  
27  
28 **ABSTRACT**

29 The grapevine trunk diseases (GTDs) Botryosphaeria dieback and esca threaten the  
30 sustainability of the grapevine industry worldwide. This study aimed to evaluate and compare  
31 the efficacy of various liquid (pyraclostrobin + boscalid and thiophanate methyl) and paste  
32 (paste + tebuconazole) formulation fungicide treatments, and biological control agents  
33 (*Trichoderma atroviride* SC1 and *T. atroviride* I-1237), for their potential to prevent infection  
34 of grapevine pruning wounds by *Diplodia seriata* and *Phaeomoniella chlamydospora* in two  
35 field trials over two growing seasons. Treatments were applied to freshly pruned wounds  
36 following their label dosages recommendations. After 24 hours, wounds were artificially  
37 inoculated with 400 spores of *D. seriata* or 800 spores of *P. chlamydospora*. Isolations were  
38 made from the treated pruning wounds after 12 months to evaluate the efficacy of the  
39 treatments. Fungicide formulations were superior to *Trichoderma*-based treatments for the  
40 control of both pathogens during both growing seasons, with mean percent disease control of  
41 44 to 95% for *D. seriata* and 46 to 67% for *P. chlamydospora*. Pyraclostrobin + boscalid was  
42 the most effective treatment. *Trichoderma atroviride*-based treatments did not reduce infection  
43 by *D. seriata* or *P. chlamydospora* compared to the untreated inoculated control in both  
44 vineyards and seasons. This study represents the first vineyard assessment of several chemical  
45 and biological treatments to protect pruning wounds against GTDs fungi in Europe and provides  
46 growers with tangible preventative control practices to minimize yield losses due to GTDs.

47  
48 **Keywords:** Botryosphaeria, chemical control, esca, *Trichoderma*, *Vitis vinifera* L.

## 49 1. Introduction

50 Botryosphaeria dieback and esca are two of the most harmful grapevine trunk diseases  
51 (GTDs) affecting vineyards in all major grape-producing areas worldwide. They currently are  
52 among the main biotic threats to the economic sustainability of viticulture reducing yields,  
53 productivity and longevity of vines and vineyards (Gramaje et al., 2018). Yield losses of 30-  
54 50% have been reported by Botryosphaeria dieback in highly infected vineyards of North  
55 America (Milholland, 1991). The economic impact of Botryosphaeria dieback along with  
56 another GTD such as Eutypa dieback in California was estimated to be \$USD260 million per  
57 year (Siebert, 2001). Esca incidence has reached up to 80% in several vineyards of Southern  
58 Italy (Romanazzi et al., 2009), and 12% of vineyards in France are currently no longer  
59 economically viable, due mainly to esca, with an annual estimated loss of €1 billion (Lorch,  
60 2014).

61 Botryosphaeria dieback is currently associated with 26 botryosphaeriaceous taxa in the  
62 genera *Botryosphaeria*, *Diplodia*, *Dothiorella*, *Lasiodiplodia*, *Neofusicoccum*, *Neoscytalidium*,  
63 *Phaeobotryosphaeria*, and *Spencermartinsia* (Úrbez-Torres, 2011; Pitt et al., 2013a, 2013b,  
64 2015; Rolshausen et al., 2013; Yang et al., 2017) with the species *Diplodia seriata* being one  
65 of the most frequently isolated fungi from diseased vines in several grape growing regions such  
66 as Australia (Savocchia et al., 2007), California (Úrbez-Torres et al., 2010), Chile (Auger et al.,  
67 2004), China (Yan et al., 2013), France (Larignon et al., 2001), Mexico (Úrbez-Torres et al.,  
68 2008), Portugal (Phillips, 2002), South Africa (van Niekerk et al., 2004) and Spain (Luque et  
69 al., 2014). Botryosphaeria dieback frequently shows as complete absence of spring growth from  
70 affected spurs due to necrosis formation in wood vascular tissues with bud-break failure, and  
71 shoot and trunk dieback (Úrbez-Torres, 2011). Wood symptoms are characterized by wedge-  
72 shaped perennial cankers and dark streaking in spurs, cordons and trunks vascular tissues  
73 usually beginning in pruning wounds (Úrbez-Torres et al., 2010).

74 Esca is mainly caused by the fungus *Phaeoconiella chlamydospora* along with  
75 *Phaeoacremonium minimum* and other *Phaeoacremonium* spp. (Gramaje et al., 2015), some  
76 *Cadophora* spp. (Travadon et al., 2015), and several basidiomycetous taxa belonging to genera  
77 *Inocutis*, *Inonotus*, *Fomitiporella*, *Fomitiporia*, *Phellinus*, and *Stereum* (Cloete et al., 2015).  
78 The most characteristic external symptoms of the chronic esca comprise multiple banding  
79 discolourations on leaves known as ‘tiger-stripe’ pattern (Surico, 2009; Gubler et al., 2015).  
80 Internal wood symptoms involve black spots in the xylem vessels, longitudinal brown to black  
81 vascular streaking, and white to light yellow soft rot that frequently develops in wood of older  
82 vines (Fischer, 2002; Lecomte et al., 2012). Apoplectic esca form is characterized by a sudden  
83 and unexpected wilting of the whole vine or one/several arms or shoots (Lecomte et al., 2012).

84 Infection of grapevines by GTD fungal pathogens primarily occurs through annual pruning  
85 wounds made during the dormant season (Gramaje et al., 2018). Pycnidia of  
86 Botryosphaeriaceae spp. and *P. chlamydospora* develop from dead/cankered wood, old pruning  
87 wounds, grapevine canes, crevices, cracks and on the bark of infected grapevines (Úrbez-Torres  
88 and Gubler, 2011; Baloyi et al., 2016), and in the case of *P. chlamydospora*, mycelium on  
89 infected wood can also be a source of conidia (Edwards and Pascoe, 2001; Edwards et al., 2001;  
90 Baloyi et al., 2016). Fruiting bodies of these fungi can also be found in pruning debris left in  
91 the vineyard, thus becoming a potential inoculum source for new infections (van Niekerk et al.  
92 2010; Úrbez-Torres, 2011; Elena and Luque, 2016b).

93 Conidia release of Botryosphaeriaceae spp. and *P. chlamydospora* has been shown to be  
94 primarily correlated with rain events (Larignon and Dubos, 2000; Eskalen and Gubler, 2001;  
95 Kuntzmann et al., 2009; van Niekerk et al., 2010; Úrbez-Torres et al., 2010; Valencia et al.,  
96 2015). The dynamics of *P. chlamydospora* dispersal in Spain were recently described by an  
97 epidemiological equation that integrated the effects of both rain and temperature (González-  
98 Domínguez et al., 2020). Conidia of Botryosphaeriaceae spp. has been shown to be primarily

99 dispersed by rain splash (Úrbez-Torres et al., 2010), while inoculum of *P. chlamydospora* is  
100 predominantly aerially dispersed (Larignon and Dubos, 2000; Eskalen and Gubler, 2001;  
101 Gubler et al., 2015; Quaglia et al., 2009). Infection occurs when conidia land on exposed and  
102 susceptible pruning wounds, germinate in xylem vessels and colonize the vine spur, cordon and  
103 trunk (Mostert et al., 2006; Epstein et al., 2008; Gubler et al., 2013; Moyo et al., 2014).

104 Susceptibility of pruning wounds to GTD pathogens is mainly dependent on the time of  
105 pruning, and the period between pruning and possible infection case. Several studies using  
106 artificial spore inoculations showed that susceptibility of grapevine pruning wounds is high  
107 when fungal infection occurs at the moment of pruning but decreases as the period between  
108 pruning and infection increases up to several weeks or months (Petzold et al., 1981; Munkvold  
109 and Marois, 1995; Eskalen et al., 2007; Serra et al., 2008; Úrbez-Torres and Gubler, 2011), with  
110 seasonal variation reported between grape regions caused primarily by climatic differences  
111 (Gramaje et al., 2018).

112 Protection of pruning wounds is essential for the management of *Botryosphaeria dieback*  
113 and *esca* in grapevine, especially if adopted early in the vineyard lifespan (Kaplan et al., 2016;  
114 Sosnowski and McCarthy, 2017). The efficacy of fungicide wound treatments against  
115 *Botryosphaeriaceae* spp. and *P. chlamydospora* has been demonstrated in Australia (Pitt et al.,  
116 2012), California (Rolshausen et al., 2010), Chile (Díaz and Latorre, 2013), New Zealand  
117 (Amponsah et al., 2012; Sosnowski and Mundi, 2019) and South Africa (Mutawila et al., 2015).  
118 The use of physical barriers such as paints and pastes formulated with or without fungicides  
119 have also shown to be effective to control infections caused by *Botryosphaeriaceae* fungi and *P.*  
120 *chlamydospora* (Epstein et al., 2008; Rolshausen et al., 2010; Pitt et al., 2012; Díaz and Latorre,  
121 2013).

122 The high restrictions that most effective chemical active ingredients are currently facing in  
123 Europe because of environmental and human health risks (Larignon et al., 2008; Spinosi et al.,  
124 2009), make indispensable address new alternatives for controlling GTDs. Over the last years,  
125 research on biological control of GTD fungi with antagonistic microorganisms has shown  
126 promising results primarily under controlled conditions (Alfonzo et al., 2009; Mutawila et al.,  
127 2011a; Haidar et al., 2016; Rezgui et al., 2016; Álvarez-Pérez et al., 2017; Dairaignes et al.,  
128 2018; Mondello et al., 2018; Andreolli et al., 2019; Del Frari et al., 2019; Mondello et al., 2019;  
129 Trotel-Aziz et al., 2019; Niem et al., 2020). Field trials with biological control agents (BCAs)  
130 have shown variable results for preventing infection by *Botryosphaeriaceae* and *esca* fungi  
131 (Kotze et al., 2011; Mutawila et al., 2011b, 2015, 2016; Mounier et al., 2014; Reis et al., 2017;  
132 Martínez-Diz et al., 2020a).

133 To our knowledge, no comparative studies to evaluate the efficacy of chemical and BCA  
134 products as pruning wound protectants against GTD fungi have been performed in Europe so  
135 far. Four pruning wound treatments are currently registered in Spain for the control of GTD  
136 fungi: three *Trichoderma*-based biological products, namely Esquive, Blindar and Vintec, and  
137 Tessior, a liquid polymer containing boscalid and pyraclostrobin (MAPA, 2020). In addition,  
138 thiophanate methyl is registered in Spain against fungal trunk pathogens in almond (MAPA,  
139 2020). The aim of this study was to evaluate and compare the efficacy of various liquid and  
140 paste formulation fungicide treatments, and BCAs, for their potential to prevent infection of  
141 grapevine pruning wounds by *D. seriata* and *P. chlamydospora* in field trials. The products  
142 assessed were those registered in Spain for control of fungal trunk pathogens or other diseases  
143 on grapevine and/or other hosts.

144

## 145 **2. Materials and methods**

### 146 *2.1 Location and characteristics of the experimental vineyards*

147

148 The assays were carried out at two commercial vineyards located in O Barco de Valdeorras,  
149 Galicia region (Spain), in 2018 and 2019. The vineyards were planted on 1981 (37-years-old)  
150 and 1989 (29-years-old) with ‘Godello’ cultivar grafted onto 110 Richter rootstock. Vines were  
151 spaced 120 cm from center to center, and with an interrow spacing of 225 cm, trained as bilateral  
152 cordons in a trellis system with a spur-pruning (Royat).

153 Vineyards were less than 500 m apart and had very similar climates. Standard cultural  
154 practices were used in both vineyards during the growing season, and the management of  
155 powdery and downy mildews was performed using only wettable sulphur and copper  
156 compounds applied at label dosages and following Integrated Pest Management (IPM)  
157 guidelines, respectively, when required. At the beginning of the study (2018), about 8% and  
158 12% of vines had shown GTDs symptoms in each vineyard, respectively. The presence and  
159 evolution of GTDs symptoms have been inspected biannually from 2014 to present in plots of  
160 1,500 vines at both vineyards. GTDs symptoms detected during inspection were associated  
161 mainly with esca such as tiger-pattern foliar necrosis, and shoots, arm and/or cordon death.

162 Both vineyards were located less than 4 km to an automatic weather station owned by  
163 Meteogalicia (Weather Service of Galician Regional Government, Xunta de Galicia) and its  
164 climatic data was considered to be representative.

## 165 166 2.2 Fungal isolates and inoculum preparation 167

168 *Diplodia seriata* isolate CJL-398 and *Phaeomoniella chlamydospora* isolate BV-130 were  
169 used. *P. chlamydospora* BV-130 was selected due to its high virulence on grapevine in previous  
170 assays (Martínez-Diz et al., 2019). This strain was isolated from a 43-year-old esca diseased  
171 vine cultivar ‘Tempranillo’ grafted onto ‘41 Berlandieri’ rootstock in 2015. *D. seriata* JL-398  
172 was the most virulent isolate among 14 in a detached grapevine cane assay (Elena et al., 2015a).  
173 This strain was isolated from cankers and wood necrosis of grapevine.

174 Conidial suspensions of each pathogen were used for artificial inoculations in the field and  
175 inoculum was obtained using methods similar to those described by Elena and Luque (2016a).  
176 In the case of *D. seriata*, a mycelial plug previously plated on Potato Dextrose Agar (PDA,  
177 Conda Laboratories, Spain) at 25°C for 7 days was cultured upside down over the center of a  
178 water agar (WA, Conda Laboratories, Spain) plate. Maritime pine (*Pinus pinaster* L.) needles  
179 were cut to 1 cm long fragments and then sterilized in an autoclave following the standard  
180 protocol of 121°C for 20 min. Then, approximately 20 sterile needles fragments were placed on  
181 the WA media surface surrounding the *D. seriata* mycelial plug at about 1 to 1.5 cm and plates  
182 were incubated under warm white fluorescent and near ultraviolet light for a 12-h photoperiod  
183 regime at 25°C for 4 weeks until pycnidia formation. The day before inoculation, pine needles  
184 fragments (about n=40) with *D. seriata* pycnidia were placed along with 30 ml of sterile  
185 distilled water (SDW) in a beaker. The solution was kept overnight (about 16 h) at 4°C in  
186 permanent agitation with the aid of a magnetic stirrer to induce conidia release from the  
187 pycnidia and prevent conidia germination. The inoculation day, the resulting solution was  
188 vacuum-filtered through a 60-mm Steriflip filter (Millipore Corporation, Billerica, MA) to get  
189 a cleaner suspension. Then, conidial suspension was adjusted to  $2 \times 10^4$  conidia mL<sup>-1</sup> using a  
190 hemocytometer (Brand™ Blaubrand™ Neubauer Counting Chamber, Thermo Fisher Scientific  
191 Inc., MA, USA).

192 *Phaeomoniella chlamydospora* strain was grown on PDA plates at 25°C for 3 weeks. Same  
193 day of inoculation, conidia were released from cultures by adding 10 ml of SDW and gently  
194 scraping with a sterile stick and the collected suspension adjusted to a concentration of  $4 \times 10^4$   
195 conidia mL<sup>-1</sup> based on counts from the hemocytometer. Both conidial suspensions were stored  
196 at 4°C until inoculation time to avoid early conidia germination.

197 Spore germination was assessed for both fungal trunk pathogens by placing four drops of  
198 the spore suspension on a PDA plate, which was then incubated at 25°C under fluorescent light  
199 for a 12-h photoperiod. After approximately 24 h, a glass cover slip was placed over each drop  
200 area on the PDA. The number of non-germinated spores over a total of 100 in each drop was  
201 counted using an optical microscope (Nikon Eclipse E400) at 100x magnification. The mean  
202 percentage of germinated spores was determined.

203

### 204 2.3 Pruning wound protection treatments

205

206 Wound protection treatments tested in the present assay are listed in Table 1. We evaluated  
207 the efficacy of two chemical and two BCA formulated products, and also a paste mixed with a  
208 fungicide. In general, the chemical and biological products assessed were those commercially  
209 formulated and currently registered and available in Spain for control of fungal trunk pathogens,  
210 except tebuconazole (Song), which is registered to control botrytis bunch rot (*Botrytis cinerea*)  
211 and powdery mildew (*Erysiphe necator*) in grapevine. Applications rates were selected based  
212 on the registered label dosages recommendations. Liquid formulations were prepared by the  
213 suspension of the products in tap water, which is the procedure normally used for spraying  
214 vineyard treatments in Galicia region. Pyraclostrobin + boscalid (Tessior) treatment contains a  
215 liquid polymer and it is already formulated to be directly sprayed to pruning wounds without  
216 any previous mixing. Paste treatment was prepared by mixing a liter of the paste formulation  
217 (Master) with 80 ml of tebuconazole (Song).

218 Regarding BCA treatments, the conidia viability of both *Trichoderma atroviride* strains  
219 (SC1 and I-1237) in the commercial products was tested to be at a minimum of 85% before the  
220 assay was set up (Pertot et al., 2016). A serial dilution of the conidia suspension was plated on  
221 PDA and the colony-forming units were counted after 24-48 h incubation at room temperature.

222

### 223 2.4 Field assay and experimental design

224

225 On 19 February 2018, 1-year-old canes of all vines to be treated were spur-pruned to three  
226 buds using secateurs in both vineyards, coinciding with the common pruning time in this region  
227 of Spain. Wounds treatments were applied by hand until runoff within 2 h after pruning to three  
228 wounds per vine. Liquid formulations were applied using a 500 ml hand-held spray bottle with  
229 a plastic shield on the nozzle to minimise spray drift and the paste formulation were applied  
230 with the aid of a paintbrush. Untreated controls, positive (artificially inoculated, IC) and  
231 negative (non-artificially inoculated, NC) were mock treated with sterile distilled water (SDW).

232 On the following day, wounds were moistened by spraying with SDW immediately prior to  
233 inoculation with the fungal trunk pathogens and a drop of Tween 20 (Sigma-Aldrich, San Luis,  
234 MO, USA) was added to each conidial suspension as a surfactant to assist spreading the spores  
235 over the pruning wound surface (Sosnowski and Mundi, 2019). Approximately 400 and 800  
236 conidia of *D. seriata* and *P. chlamydospora*, respectively, suspended in a drop of 20 µl of SDW  
237 were then applied per wound using a micropipette. All pruning wounds were inoculated with  
238 the pathogen inoculum except NC controls, which were mock inoculated with a drop of 20 µl  
239 of SDW alone instead and being exposed to natural infection. Inoculum drops placed onto the  
240 pruning wounds were left to air dry (from some minutes to 1 h) before being wrapped with  
241 Parafilm M (Pechiney Plastic Packaging, Chicago, IL, USA) to avoid fast dehydration and  
242 favour fungal spores' penetration into xylem vessels. Due care was taken to avoid the rain for  
243 the entire duration of the trials set up, namely pruning, wound treatments application and  
244 artificial fungal inoculation (2 days).

245 The experiment was set up as a randomized block design with three replicates of ten plants  
246 (thirty canes) per wound protectant treatment and pathogen in each vineyard. Three replicates

247 of ten plants per pathogen were also used for IC in each vineyard. Additionally, three replicates  
248 of ten plants were used as NC in each vineyard. The experiment was repeated the following  
249 season (2019–20), with pruning and wound treatments applied on 12 February 2019, and  
250 artificial fungal inoculations on 13 February 2019.

### 251 252 *2.5 Fungal recovery and identification*

253  
254 Canes were harvested from vines above the second bud (about 10 cm long pieces)  
255 approximately 12 months after artificial inoculation and stored in a 4°C cool room prior to  
256 laboratory assessment. Bark was first removed using a sharp knife from each cane. Then, canes  
257 were surface sterilised for 1 min in 33% sodium hypochlorite (commercial 40 g Cl/l) and rinsed  
258 twice for 1 min each in SDW. After air drying on sterile filter paper to remove moisture excess,  
259 each cane was cut into small pieces (about 12 mm<sup>2</sup>) taken from the margin between discoloured  
260 or dead and live or apparently healthy wood tissue using sterilised secateurs. Five wood  
261 fragments were plated onto each of two plates of Malt Extract Agar (MEA) amended with 0.35  
262 g l<sup>-1</sup> of streptomycin sulphate (Sigma-Aldrich, St. Louis, MO, USA) (MEAS) giving a total of  
263 ten wood pieces per cane. Cultures were incubated at 25°C under warm fluorescent light for a  
264 12-h photoperiod and inspected daily for 15 days. All growing fungal colonies were transferred  
265 to PDA plates and then assessed for the presence or absence fungal mycelial growth resembling  
266 *D. seriata*, *P. chlamydospora* or *Trichoderma* spp.

267 Identification of GTD fungal cultures was then assessed under a stereoscopic (Olympus  
268 SZX9, Olympus Corporation, Tokyo, Japan) and optical microscopes (Nikon Eclipse E400,  
269 Nikon Corporation, Tokyo, Japan) based on cultural and morphological features previously  
270 described including colony growth pattern, colour, mycelial and other characteristics such as  
271 conidial shape, size and colour (Crous and Gams, 2000; Phillips et al., 2007). Identity of GTD  
272 fungal isolates and *Trichoderma* spp. was confirmed by molecular methods. Fungal DNA was  
273 extracted from fresh mycelium after 3 weeks of incubation in PDA using the E.Z.N.A. Plant  
274 Miniprep Kit (Omega Bio-Tek, Doraville, GA, USA) following manufacturer's instructions. *D.*  
275 *seriata* was confirmed by sequencing part of the translation elongation factor 1- using the  
276 primer pairs EF1F-EF2R (Jacobs et al., 2004). *P. chlamydospora* was detected by PCR using  
277 the primers Pch1-Pch2 (Tegli et al., 2000). Identity of *Trichoderma* spp. was confirmed at  
278 species level by sequencing the ITS region using the universal primers ITS1F/ITS4 (Gardes  
279 and Bruns, 1993). All PCR products were visualized in 1% agarose gels (agarose D-1 Low  
280 EEO, Conda Laboratories) and sequenced in both direction by Eurofins GATC Biotech  
281 (Cologne, Germany).

### 282 283 *2.6 Data analysis*

284  
285 Efficacy of each wound treatment was calculated as mean percentage recovery (MPR) of  
286 *D. seriata* and *P. chlamydospora* from each cane per treatment (Sosnowski et al., 2008, 2013).  
287 Data were checked for normality and homogeneity of variances prior to statistical analyses and  
288 transformed when required into the arcsine of the square root of the proportion (MPR/100)<sup>1/2</sup>.  
289 The statistical analysis of the experimental results was carried out in a two-way ANOVA with  
290 blocks and treatments as independent variables, and MPR (%) as dependent variable. Mean  
291 percentage disease control (MPDC) was also determined as the reduction in MPR (%) as a  
292 proportion of the artificially inoculated control (IC) (MPDC=100 × [1 – (MPR treatment/MPR  
293 IC)]) (Sosnowski et al., 2008, 2013). Means were compared with ICs by the Student's *t* least  
294 significant difference (LSD) at *P* < 0.05. Data from all experiments were analysed using the  
295 Statistix 10 software (Analytical Software).

296

### 297 3. Results

#### 298 3.1 Wound treatment evaluation against *Diplodia seriata*

299  
300 During 2018-19 and 2019-20 seasons, *D. seriata* spore germination on PDA was 94% and  
301 98.5%, respectively, and it was recovered from 58 and 68% of IC wounds, respectively (Table  
302 2). *D. seriata* was recovered from 1% of NCs wounds at both seasons. Analysis of variance  
303 showed that there were significant differences in the relative recovery data from the different  
304 treatments between seasons ( $P<0.05$ ). No significant differences were found in the recovery  
305 data between vineyards in each season (2018-19,  $P=0.904$ ; 2019-20,  $P=0.593$ ), so data from  
306 each vineyard were combined and the analysis was performed separately for each season (Table  
307 2).

308 Treatment with pyraclostrobin + boscalid, thiophanate methyl, and the paste + tebuconazole  
309 significantly reduced the MPR of *D. seriata* from pruning wounds with respect to the IC at both  
310 seasons ( $P<0.05$ ) (Table 2). During 2018-19 season, pyraclostrobin + boscalid, thiophanate  
311 methyl, and the paste + tebuconazole provided MPDC of 95, 90 and 76%, respectively, whereas  
312 these products provided MPDC of 69, 54 and 44%, respectively, during 2019-20 season. During  
313 both seasons, there was not a significant treatment effect with *Trichoderma*-based wound  
314 protectants ( $P>0.05$ ). During 2018-19 season, *T. atroviride* SC1 and *T. atroviride* I-1237  
315 provided MPDC of 10, and 26%, respectively, while these products provided MPDC of 22 and  
316 32%, respectively, during 2019-20 season.

317

#### 318 3.2 Wound treatment evaluation against *Phaeomoniella chlamydospora*

319  
320 During 2018-19 and 2019-20 seasons, *P. chlamydospora* spore germination on PDA was  
321 89% and 93%, respectively, and it was recovered from 27 and 42% of IC wounds, respectively  
322 (Table 3). *P. chlamydospora* was recovered from 0% and 3% of NCs wounds during 2018-19  
323 and 2019-20 seasons, respectively. There were no significant differences in the relative  
324 recovery data from the different treatments between vineyards ( $P=0.500$ ) and seasons  
325 ( $P=0.080$ ), so data were combined for analysis.

326 There was a significant treatment effect ( $P<0.05$ ) with the paste + tebuconazole and  
327 pyraclostrobin + boscalid treatments reducing MPR of *P. chlamydospora* to 12 and 18%  
328 compared with 36% from the IC wounds (MPDC of 67 and 51%; Table 3). There was not a  
329 significant treatment effect with thiophanate methyl and *Trichoderma*-based wound protectants  
330 ( $P>0.05$ ). Thiophanate methyl provided MPDC of 46%, whereas *T. atroviride* SC1 and  
331 *T. atroviride* I-1237 provided MPDC of 0 and 17%, respectively.

332

#### 333 3.3 *Trichoderma*-based treatments colonization

334

335 The conidia viability was on average of 97% and 95% for *T. atroviride* SC1 during 2018-  
336 19 and 2019-20 seasons, respectively. Regarding *T. atroviride* I-1237, the conidia viability was  
337 94% during 2018-19 season and 96% during 2019-20 season. *Trichoderma* spp. were  
338 exclusively recovered from pruning wounds treated with *Trichoderma*-based formulations at  
339 varying levels. There were no significant differences in the relative recovery data between  
340 vineyards ( $P=0.180$ ) and seasons ( $P=0.075$ ). During 2018-19, recovery percentages were 5 and  
341 10% for *T. atroviride* SC1 and *T. atroviride* I-1237, respectively. During 2019-20, recovery  
342 percentages were 9% and 14% for *T. atroviride* SC1 and *T. atroviride* I-1237, respectively.

343

#### 344 3.4 Weather data

345

346 During 2018-19 season, the average of the daily mean temperature and relative humidity in  
347 the week from the day of pruning and wound treatments application (from 19 to 25 February  
348 2018) was 6.5°C and 67.5%, respectively, with no rain events in that period. The average of  
349 daily mean temperature, daily mean relative humidity and accumulated rainfall for the whole  
350 month of February 2018 was 5.8°C, 76.6% and 84.2 mm, respectively, with nine rain events  
351 (of >1 mm) in total.

352 During 2019-20 season, the week from the day of pruning and application of wound  
353 treatments (from 12 to 18 February 2019) registered an average of the daily mean temperature  
354 of 8.2°C and a 71.1% on average of daily relative humidity. For the same period, there was only  
355 one rain event (18 February 2019) with a total rainfall of 10.6 mm. Regarding the whole  
356 February 2019 month, the average of the daily temperature was 8.2°C and of the daily relative  
357 humidity 73.3%. The total rainfall in the same month was 37 mm received in a total of four rain  
358 events.

#### 359 360 **4. Discussion**

361 The present study represents the first vineyard comparison of the efficacy of paste and  
362 liquid fungicides, and BCA treatments to protect pruning wounds against GTDs fungi in  
363 Europe. Considering the high incidence of GTDs, particularly esca, and the restrictions on the  
364 use of chemicals in Europe (Mondello et al., 2018), this study provides growers with tangible  
365 preventative control practices to minimize yield losses due to GTDs. By focussing on products  
366 already registered for control of trunk diseases in almond or foliar diseases of grapevines in  
367 Spain, the lower cost of label extension compared to new product registration will increase the  
368 likelihood and success of registration for GTDs. *D. seriata* was chosen to represent  
369 Botryosphaeria dieback, because it is one the most common cited Botryosphaeriaceae species  
370 occurring on grapevines worldwide and is reported to be a virulent species in Spain (Luque et  
371 al., 2009; Elena et al., 2015b). *P. chlamydospora* was chosen to represent esca, because it is the  
372 most frequently isolated species from affected vines in most grape growing regions worldwide  
373 (Berstch et al., 2013; Gubler et al., 2015).

374 Our results demonstrate that paste and liquid fungicide formulations were superior to  
375 *Trichoderma*-based treatments for the control of *D. seriata* and *P. chlamydospora*. All paste  
376 and liquid fungicide treatments tested reduced recovery of both pathogens from inoculated  
377 wounds compared with the untreated inoculated control, with the exception of thiophanate  
378 methyl for *P. chlamydospora*. Similar results were observed in other studies where several  
379 fungicides and BCA treatments were compared as pruning wound protectants in the same field  
380 trial. In Australian vineyards, liquid and paste fungicide formulations were more effective than  
381 *Trichoderma*- and *Bacillus subtilis*-based formulations against *D. seriata* and *Diplodia mutila*  
382 (Pitt et al., 2012), and *Eutypa lata* (Ayres et al., 2017) infections, respectively. Halleen et al.  
383 (2010) also reported that fungicides were more effective than *Trichoderma* spp. against *E. lata*  
384 infection in field trials carried out in South Africa, in spite of the efficacy of *Trichoderma*  
385 treatments in reducing GTD fungal infection.

386 Application of pyraclostrobin + boscalid to pruning wounds provided high mean  
387 percentage of disease control (MPDC) for both pathogens. To date, only preliminary studies  
388 have been carried out in field trials in Germany (Kühn et al., 2017; Lengyel et al., 2019), Greece  
389 (Kühn et al., 2017; Samaras et al., 2019) and Spain (Kühn et al., 2017), where pyraclostrobin  
390 and boscalid (Tessior) was effective as pruning wound protectant reducing the grapevine wood  
391 infection caused by *Diplodia* spp. and *P. chlamydospora*. The application of a similar  
392 commercial product based on pyraclostrobin and boscalid without the liquid polymer  
393 (BASF516, BASF Australia Ltd, Sidney, New South Wales, Australia) showed a low efficacy  
394 against *E. lata* artificial pruning wound inoculations in Australian vineyards (Sosnowski et al.,  
395 2008). Wound applications of pyraclostrobin alone were effective for the control of *D. seriata*



396 and *P. chlamydospora* in Chile (Díaz and Latorre, 2013) and California (Rolshausen et al.,  
397 2010) vineyards. Moreover, this active ingredient significantly reduced infections caused by  
398 fungi associated with *Botryosphaeria dieback* (Rolshausen et al., 2010), *Eutypa dieback*  
399 (Sosnowski et al., 2008, 2013; Rolshausen et al., 2010; Ayres et al., 2017), and *esca*  
400 (Rolshausen et al., 2010), under field conditions.

401 The only treatment to provide a similar level of control than pyraclostrobin + boscalid for  
402 both pathogens was the paste with tebuconazole. Accordingly, applications of paste and liquid  
403 formulations containing tebuconazole on pruning wounds of ‘Cabernet Sauvignon’ vines  
404 significantly reduced the mean vascular discolouration length and the reisolation percentage of  
405 *D. seriata* and *P. chlamydospora* in Chilean vineyards (Díaz and Latorre, 2013). In Australia,  
406 a gel and a paint with tebuconazole applied by paintbrush to freshly pruned canes reduced *E.*  
407 *lata* infections to 100% and 94%, respectively (Sosnowski et al., 2013). Pitt et al. (2012) also  
408 demonstrated that a tebuconazole paste formulation provided a 38% control of *D. mutila* in a  
409 trial performed in Australia. Other physical barriers containing a paste with fungicides have  
410 resulted effective at reducing pruning wound infections by other GTD fungi (Rolshausen and  
411 Gubler, 2005; Sosnowski et al., 2008; Rolshausen et al., 2010; Pitt et al., 2012). Liquid spray  
412 applications of tebuconazole were also significantly effective reducing the recovery of *D.*  
413 *seriata* in Australia (Pitt et al., 2012).

414 Thiophanate methyl was effective in reducing infection by *D. seriata*, while no significant  
415 effect was observed against *P. chlamydospora*. Similar findings were reported by Rolshausen  
416 et al. (2010) in California, where pruning wounds applications of thiophanate methyl reached a  
417 disease control of 80% for *D. seriata* infections but did not perform as well against *P.*  
418 *chlamydospora* with only a 52% of disease control. In Chile, Díaz and Latorre (2013) reported  
419 the efficacy of both liquid and paste formulations of thiophanate methyl to control *D. seriata*  
420 and *P. chlamydospora* infections in pruning wounds. This chemical compound was also  
421 effective in reducing the pruning wound infections caused by *P. chlamydospora* and  
422 *Neofusicoccum luteum* in field trials carried out in South Africa (Mutawila et al., 2015) and  
423 New Zealand (Amponsah et al., 2012), respectively.

424 Pastes and paints are considered the most reliable protectants of pruning wounds against  
425 GTD fungi, especially when they are mixed with fungicides (Moller et al., 1977; Rolshausen  
426 and Gubler, 2005; Rolshausen et al., 2010; Sosnowski et al., 2008, 2013; Díaz and Latorre,  
427 2013). They provide a physical barrier to protect pruning wounds from GTD fungal infection  
428 while the fungicide can also act on the pathogens if the physical barrier is compromised by rain,  
429 sap flow, or cracking when drying (Sosnowski et al., 2008). However, some other studies  
430 reported no differences in effectiveness between application of acrylic paint with or without  
431 fungicides (Sosnowski et al., 2008; Mayet and Lecomte, 2014). Pastes and paints are usually  
432 applied by hand with a paint brush, unless the product contains a liquid polymer to act as a  
433 physical barrier, which is the case of Tessior commercial product. It should be noted that  
434 application by hand is more time-consuming and can be at least two to four times the application  
435 cost with a tractor mounted sprayer (Sosnowski and McCarthy, 2017). Further research is  
436 therefore required to determine the protective mechanisms of each component and if their  
437 efficacy is also influenced by other factors such as wound size, application time, and weather  
438 variables.

439 Species of the fungal genus *Trichoderma* have been the most investigated BCA to act as  
440 pruning wound protectant against GTDs pathogens (John et al., 2005; Halleen et al., 2010;  
441 Kotze et al., 2011; Mutawila et al., 2015, 2016; Reis et al., 2017). Our results shown that  
442 *Trichoderma atroviride*-based treatments did not reduce infection by *D. seriata* or *P.*  
443 *chlamydospora* compared to the untreated inoculated control in both vineyards and seasons.  
444 This is the first report to assess the efficacy of *T. atroviride* SC1 in protecting grapevine pruning  
445 wounds from infection by GTD fungi in mature vineyards. In recent research, Berbegal et al.

446 (2020) applied *T. atroviride* SC1 to pruning wounds of 3-year-old vines but its efficacy as  
447 wound protectant against GTD pathogens was not tested in this specific plant part. In nurseries,  
448 *Trichoderma atroviride* SC1 showed high efficacy to reduce artificial (Pertot et al., 2016) or  
449 natural (Bebegal et al., 2020) *P. chlamydospora* infection when applied at different  
450 propagation stages. Preliminary results showed the efficacy of *T. atroviride* I-1237 to reduce  
451 the disease incidence and severity of *P. chlamydospora* and *N. parvum* on pruning wounds in  
452 Portuguese vineyards (Reis et al., 2017). Similarly, Mounier et al. (2014) demonstrated that  
453 spraying pruning wounds with *T. atroviride* I-1237 over two years significantly reduced the  
454 esca, and Botryosphaeria and Eutypa diebacks foliar symptoms expression, and the plant  
455 mortality rate due to GTDs in French vineyards. Dipping young grapevine plants in *T.*  
456 *atroviride* I-1237 during the nursery propagation process decreased *D. seriata* and *P.*  
457 *chlamydospora* DNA and necrotic lesion length compared to the untreated plants (Mounier et  
458 al., 2014). Other *Trichoderma* strains or *Trichoderma*-based commercial products have shown  
459 high efficacy in reducing the recovery of GTDs fungal pathogens from artificially inoculated  
460 pruning wounds under field conditions (John et al., 2005; Halleen et al., 2010; Kotze et al.,  
461 2011; Pitt et al., 2012; Mutawila et al., 2015).

462 These inconsistencies found in the *Trichoderma* products performance among our study  
463 and previous reports could be due to different reasons. Although *Trichoderma* spp. have the  
464 ability to provide long-term protection to pruning wounds and thus preventing fungal trunk  
465 pathogens infections, they firstly need to establish itself, grow and colonize wounds instead of  
466 a simply temporal establishment (Munkvold and Marois, 1993; Mutawila et al., 2011a, 2011b).  
467 In this study, pruning wound colonization by both strains of *T. atroviride* was very low at both  
468 vineyards and seasons ranging from 5 to 14%. Environmental conditions such as the  
469 temperature at the time of application might have a negative influence in the persistence and  
470 implementation of *Trichoderma* spp. (Elmer and Reglinski, 2006; Pertot et al., 2017).  
471 According to the label recommendations of each product, *T. atroviride* SC1 formulation should  
472 be applied when environmental temperature is equal or higher than 10°C for a minimum of five  
473 hours on the day of application in the field, while *T. atroviride* I-1237 formulation is supposed  
474 to be biologically active at temperatures above 5°C. The average of the daily mean temperature  
475 experienced in the week of the trials set up was 6.5°C and 8.2°C during 2018-19 and 2019-20  
476 seasons, respectively, a fact that could explain the low colonization performed by *Trichoderma*-  
477 based formulations. In addition, a slightly higher *Trichoderma* recovery was registered during  
478 2019-20 season (9.4 to 13.5%) than 2018-19 (4.8 to 9.8%) probably also explained by the  
479 warmer temperatures registered in this season.

480 Timing of pruning within the dormant season should be adjusted to periods with mild and  
481 favourable temperature values that might lead to a better implantation and development of the  
482 BCA on pruning wounds and thus increasing its effectiveness against GTD pathogens.  
483 *Trichoderma* spp. application after pruning in late winter or early spring would likely provide  
484 higher disease control than normal pruning in winter. However, late pruning is not feasible in  
485 all vineyards. In those vineyards with limited labour force, growers need to begin pruning early  
486 in the winter to ensure completion of the activity before bud break. An alternative would be to  
487 prune in late autumn or early winter. Recent research carried out in the same grape-growing  
488 region of the present study reported low abundances of GTDs pathogens infecting naturally  
489 pruning wounds after an early pruning made in November (Martínez-Diz et al., 2020b). The  
490 age and physiological state of the vine as well as the dose and product formulation have also  
491 been suggested as factors that could have an influence on effective colonization by *Trichoderma*  
492 spp. (Schubert et al., 2008; Halleen et al., 2010; Mutawila et al., 2016). However, further  
493 research is required to confirm these hypotheses.

494 Label instructions of most fungicide and BCA commercial formulations to protect pruning  
495 wounds recommend their application shortly after pruning to minimize the chances of GTDs

496 infection. In our study, we followed the official method of European countries to evaluate  
497 pruning wounds protection products against *E. lata*, which suggests carrying out fungal  
498 inoculations 24 hours after the application of preventive treatments (EPPO, 2017). Accordingly,  
499 in most of the previous pruning wound protection trials, the time elapsed between pruning  
500 wound protection and GTD fungal inoculation was 24 hours (John et al., 2005; Sosnowski et  
501 al., 2008, 2013; Halleen et al., 2010; Rolshausen et al., 2010; Kotze et al., 2011; Amponsah et  
502 al., 2012; Pitt et al., 2012; Díaz and Latorre, 2013; Ayres et al., 2017; Sosnowski and Mundi,  
503 2019). This short time between BCA treatments application and artificial fungal inoculations  
504 could also have explained the poor performance exhibited by *Trichoderma*-based commercial  
505 formulations in our study. Previous research reported a greater biocontrol efficacy when  
506 artificial GTD pathogen infection was delayed 7 (Kotze et al., 2011; Mutawila et al., 2015) and  
507 14 (Munkvold and Marois, 1993; John et al., 2005) days after application of *Trichoderma* spp.  
508 on pruning wounds. These findings suggest BCAs might need a period to colonise the pruning  
509 wound surface and grapevine wood to be effective, as reported by John et al. (2005).

510 The use of pathogen artificial inoculations is very common in the assessment of the efficacy  
511 of pruning wound protectants against GTDs to guarantee a substantial establishment of  
512 infection in untreated inoculated controls for statistical analysis (Halleen et al., 2010;  
513 Rolshausen et al., 2010; Sosnowski et al., 2008, 2013; Amponsah et al., 2012; Pitt et al., 2012;  
514 Ayres et al., 2017; Sosnowski and Mundi, 2019). In the present study, artificial inoculations  
515 with 400 (*D. seriata*) and 800 (*P. chlamydospora*) conidia were applied per wound to obtain  
516 optimal recovery percentages for robust evaluation of treatments according to doses  
517 recommendations made by Elena et al. (2015b). This fact represents a significantly higher  
518 ‘disease pressure’ than that which might be expected to occur under natural conditions. Wounds  
519 were infected naturally up to 1% by *D. seriata* and 3% by *P. chlamydospora*, in contrast with  
520 the artificially inoculated controls recovery with up to 68% and 42%, respectively. This  
521 indicates that wound protectants that showed lower efficacy rates in this study, such as BCA  
522 formulations, will most likely provide better control of both *D. seriata* and *P. chlamydospora*  
523 under ‘natural disease pressure’ in the vineyard. The efficacy of pruning wound protectants  
524 under lower artificial GTD inoculum levels or natural infections in the vineyard should be tested  
525 in future studies. Different affinities of *T. atroviride* strains for specific grapevine cultivars has  
526 been previously reported in South Africa (Mutawila et al., 2011b), and this should not be  
527 discarded as a possible cause of the low *Trichoderma* colonization rates obtained in this study.

528 To conclude, this study highlighted the efficacy of several fungicides with or without a  
529 physical barrier to protect grapevine pruning wounds against *D. seriata* and *P. chlamydospora*  
530 infections under field conditions. In particular pyraclostrobin + boscalid (Tessior), a registered  
531 product against GTD fungi in several countries in Europe, is recommended as pruning wound  
532 protectant to prevent infection by the most prevalent pathogens associated with *Botryosphaeria*  
533 dieback and esca. *Trichoderma*-based treatments showed lower efficacy against GTD fungi  
534 than that provided by fungicides and their performance seems to be related to environmental  
535 conditions and wound colonisation prior to infection by the pathogens. Good pruning practices  
536 along with strict sanitation procedures and pruning wound protection by the application of  
537 authorized products can significantly reduce the impact of GTD pathogens infections and thus  
538 increasing the lifespan of vineyards.

#### 539 540 **Declaration of Competing Interest**

541  
542 The authors declare that they have no known competing financial interests or personal  
543 relationships that could have appeared to influence the work reported in this paper.

#### 544 545 **Acknowledgments**

546 This work has been funded by European funds in collaboration with the ‘Ministerio de  
547 Agricultura, Pesca y Alimentación (MAPA)’ (Spanish Government) and the ‘Xunta de Galicia’  
548 (Regional Government) through the project ‘EVID: Innovative practices to combat grapevine  
549 diseases’ (FEADER 2017/003B). The authors acknowledge Bodegas Godeval for the provision  
550 of field sites and technical assistance for this study. We also thank Dr. J. Luque for the provision  
551 of *Diplodia seriata* isolate JL-398. M.P. Martínez-Diz was supported by the FPI-INIA program  
552 from the INIA (CPD2015-0188). D. Gramaje was supported by the Ramón y Cajal program,  
553 Spanish Government (RYC-2017-23098).

554

## 555 References

- 556 Alfonzo, A., Conigliaro, G., Torta, L., Burruano, S., and Moschetti, G., 2009. Antagonism of  
557 *Bacillus subtilis* strain AG1 against vine wood fungal pathogens. *Phytopathol. Mediterr.*  
558 48, 155-158. DOI: 10.14601/Phytopathol\_Mediterr-2886
- 559 Álvarez-Pérez, J.M., González-García, S., Cobos, R., Olego, M.A., Ibañez, A., Díez-Galán, A.,  
560 Garzón-Jimeno, E., Coque, J.J.R., 2017. Use of endophytic and rhizospheric actinobacteria  
561 from grapevine plants to reduce nursery fungal infections that lead to young grapevine  
562 decline. *Appl Environ Microb.* 83, e01564-17. <https://doi.org/10.1128/AEM.01564-17>
- 563 Amponsah, N.T., Jones, E.E., Ridgway, H.J., Jaspers, M.V., 2012. Evaluation of fungicides for  
564 the management of *Botryosphaeria dieback* diseases of grapevines. *Pest Manag. Sci.* 68,  
565 676-683. <https://doi.org/10.1002/ps.2309>
- 566 Andreolli, M., Zapparoli, G., Angelini, E., Lucchetta, G., Silvia Lampis, S., Vallini, G., 2019.  
567 *Pseudomonas protegens* MP12: A plant growth-promoting endophytic bacterium with  
568 broad-spectrum antifungal activity against grapevine phytopathogens. *Microbiol. Res.*  
569 219, 123-131. <https://doi.org/10.1016/j.micres.2018.11.003>
- 570 Auger J., Esterio, M., Ricke G., Perez, I., 2004. Black dead arm and basal canker on *Vitis*  
571 *vinifera* cv. Red Globe caused by *Botryosphaeria obtusa* in Chile. *Plant Dis.* 88, 1286.  
572 DOI: 10.1094/PDIS.2004.88.11.1286A
- 573 Ayres, M.R., Wicks, T.J., Scott, E.S., Sosnowski, M.R., 2017. Developing pruning wound  
574 protection strategies for managing *Eutypa dieback*. *Aust. J. Grape Wine Res.* 23, 103-111.  
575 DOI: 10.1111/ajgw.12254
- 576 Baloyi, M.A., Hallen, F., Mostert, L., Eskalen, A., 2016. First report of *Phaeomoniella*  
577 *chlamydospora* pycnidia as Petri disease inoculum sources in South African vineyards.  
578 *Plant Dis.* 100, 2528. <https://doi.org/10.1094/PDIS-04-16-0569-PDN>
- 579 Berbegal, M., Ramón-Albalat, A., León, M., Armengol, J., 2020. Evaluation of long-term  
580 protection from nursery to vineyard provided by *Trichoderma atroviride* SC1 against  
581 fungal grapevine trunk pathogens. *Pest Manag. Sci.* 76, 967-977. DOI: 10.1002/ps.5605
- 582 Bertsch, C., Ramirez-Suero, M., Magnin-Robert, M., Larignon, P., Chong, J., Abou- Mansour,  
583 E., Spagnolo, A., Clément, C., Fontaine, F., 2013. Grapevine trunk diseases: complex and  
584 still poorly understood. *Plant Pathol.* 62, 243-265. DOI: 10.1111/j.1365-  
585 3059.2012.02674.x
- 586 Cloete, M., Fischer, M., Mostert, L., Halleen, F., 2015. Hymenochaetales associated with esca-  
587 related wood rots on grapevine with a special emphasis on the status of esca in South  
588 African vineyards. *Phytopathol. Mediterr.* 54, 299-312.
- 589 Crous, P.W., Gams, W., 2000. *Phaeomoniella chlamydospora* gen. et comb. nov., a causal  
590 organism of Petri grapevine decline and esca. *Phytopathol. Mediterr.* 39, 112-118.  
591 [https://doi.org/10.14601/Phytopathol\\_Mediterr-1530](https://doi.org/10.14601/Phytopathol_Mediterr-1530)
- 592 Daraignes, L. Gerbore, J., Yacoub, A., Dubois, L., Romand, C., Zekri, O., Roudet, J., Chambon,  
593 P., Fermaud, M., 2018. Efficacy of *P. oligandrum* affected by its association with bacterial  
594 BCAs and rootstock effect in controlling grapevine trunk diseases. *Biol. Control* 119, 59-  
595 67. <https://doi.org/10.1016/j.biocontrol.2018.01.008>

- 596 Del Frari, G., Cabral, A., Nascimento, T., Boavida Ferreira, R., Oliveira, H., 2019. *Epicoccum*  
597 *layuense* a potential biological control agent of esca-associated fungi in grapevine. PLoS  
598 ONE 14, e0213273. <https://doi.org/10.1371/journal.pone.0213273>
- 599 Díaz, G.A., Latorre, B.A., 2013. Efficacy of paste and liquid fungicide formulations to protect  
600 pruning wounds against pathogens associated with grapevine trunk diseases in Chile. Crop  
601 Prot. 46, 106-112. <http://dx.doi.org/10.1016/j.cropro.2013.01.001>
- 602 Edwards, J., Laukart, N., Pascoe, I., 2001. *In situ* sporulation of *Phaeomoniella chlamydospora*  
603 in the vineyard. Phytopathol. Mediterr. 40, 61-66. DOI: 10.14601/Phytopathol\_Mediterr-  
604 1586
- 605 Edwards, J., Pascoe, I.G., 2001. Pycnidial state of *Phaeomoniella chlamydospora* found on  
606 'Pinot Noir' grapevines in the field. Australas. Plant Pathol. 30, 67.  
607 <https://doi.org/10.1071/AP00061>
- 608 Elena, G., García-Figueres, F., Reigada, S., Luque, J., 2015a. Intraspecific variation in *Diplodia*  
609 *seriata* isolates occurring on grapevines in Spain. Plant Pathol. 64, 680-689. DOI: Doi:  
610 10.1111/ppa.12296
- 611 Elena, G., Luque, J., 2016a. Seasonal susceptibility of pruning wounds and cane colonization  
612 in Catalonia, Spain following artificial infection with *Diplodia seriata* and *Phaeomoniella*  
613 *chlamydospora*. Plant Dis. 100, 1651-1659. DOI: 10.1094/PDIS-10-15-1186-RE
- 614 Elena, G., Luque, J., 2016b. Pruning debris of grapevine as a potential inoculum source of  
615 *Diplodia seriata*, causal agent of Botryosphaeria dieback. Eur. J. Plant Pathol. 144, 803-  
616 810. <https://doi.org/10.1007/s10658-015-0782-9>
- 617 Elena, G., Sosnowski, M.R., Ayres, M.R., Lecomte, P., Benetreau, C., Garcia-Figueres, F.,  
618 Luque, J., 2015b. Effect of the inoculum dose of three grapevine trunk pathogens on the  
619 infection of artificially inoculated pruning wounds. Phytopathol. Mediterr. 54, 345-354.  
620 DOI: 10.14601/Phytopathol\_Mediterr-16010
- 621 Elmer, P.A.G., Reglinski, T., 2006. Biosuppression of *Botrytis cinerea* in grapes. Plant Pathol.  
622 55, 155e177. <https://doi.org/10.1111/j.1365-3059.2006.01348.x>
- 623 EPPO, 2017. Standard PP 1/303 (1) *Eutypa lata* on grapevine. Bulletin OEPP/EPPO Bulletin  
624 47, 333-336.
- 625 Epstein, L., Sukhwinder, K., VanderGheynst, J.S., 2008. Botryosphaeria-related dieback and  
626 control investigated in non-coastal California grapevines. Calif. Agric. 62, 161-166.
- 627 Eskalen, A., Feliciano, J., Gubler, W.D., 2007. Susceptibility of grapevine pruning wounds and  
628 symptom development in response to infection by *Phaeoacremonium aleophilum* and  
629 *Phaeomoniella chlamydospora*. Plant Dis. 91, 1100-1104. [https://doi.org/10.1094/PDIS-](https://doi.org/10.1094/PDIS-91-9-1100)  
630 [91-9-1100](https://doi.org/10.1094/PDIS-91-9-1100)
- 631 Eskalen, A., Gubler, W.D., 2001. Association of spores of *Phaeomoniella chlamydospora*,  
632 *Phaeoacremonium inflatipes*, and *Pm. aleophilum* with grapevine cordons in California.  
633 Phytopathol. Mediterr. 40S, 429-432. DOI: 10.14601/Phytopathol\_Mediterr-1613
- 634 Fischer, M., 2002. A new wood-decaying basidiomycete species associated with esca of  
635 grapevine: *Fomitiporia mediterranea* (Hymenochaetales). Mycol. Prog. 1, 315-324. DOI:  
636 10.1007/s11557-006-0029-4
- 637 Gardes, M., Bruns, T.D., 1993. ITS primers with enhanced specificity for Basidiomycetes:  
638 application to the identification of mycorrhizae and rusts. Mol. Ecol. 2, 113-118.
- 639 González-Domínguez, E., Berlanas, C., Gramaje, D., Armengol, J., Rossi, V., Berbegal, M.,  
640 2020. Temporal dispersal patterns of *Phaeomoniella chlamydospora*, causal agent of Petri  
641 disease and esca, in vineyards. Phytopathology. [https://doi.org/10.1094/PHYTO-10-19-](https://doi.org/10.1094/PHYTO-10-19-0400-R)  
642 [0400-R](https://doi.org/10.1094/PHYTO-10-19-0400-R)
- 643 Gramaje, D., Mostert, L., Groenewald, J.Z., Crous, P.W., 2015. *Phaeoacremonium*: From esca  
644 disease to phaeohyphomycosis. Fungal Biol. 199, 759-783. DOI:  
645 10.1016/j.funbio.2015.06.004

- 646 Gramaje, D., Úrbez-Torres, J.R., Sosnowski, M.R., 2018. Managing grapevine trunk diseases  
647 with respect to etiology and epidemiology: Current strategies and future prospects. *Plant*  
648 *Dis.* 102, 12-39. <https://doi.org/10.1094/PDIS-04-17-0512-FE>
- 649 Gubler, W.D., Mugnai, L., Surico, G., 2015. Esca, Petri and Grapevine leaf stripe disease, in:  
650 Wilcox, W.F., Gubler, W.D., Uyemoto, J.K. (Eds.), *Compendium of Grape Diseases,*  
651 *Disorders, and Pests*, 2nd Edition. APS Press, St Paul, MN, pp. 52-56.
- 652 Gubler, W.D., Rooney-Latham, S., Vasquez, S.J., Eskalen, A., 2013. Esca (Black Measles) and  
653 Petri disease, in: Bettiga, L.J. (Ed.), *Grape Pest Management*. University of California,  
654 Agriculture and Natural Resources, Publication 3343, pp. 120-125.
- 655 Haidar, R., Roudet, J., Bonnard, O., Dufour, M., Corio-Costet, M., Fert, M., Gautier, T.,  
656 Deschamps, A., Fermaud, M., 2016. Screening and modes of action of antagonistic  
657 bacteria to control the fungal pathogen *Phaeoemoniella chlamydospora* involved in  
658 grapevine trunk diseases. *Microbiol. Res.* 192, 172-184.  
659 <https://doi.org/10.1016/j.micres.2016.07.003>
- 660 Halleen, F., Fourie, P.H., Lombard, J., 2010. Protection of grapevine pruning wounds against  
661 *Eutypa lata* by biological and chemical methods. *S. Afr. J. Enol. Vitic.* 31, 125-132. DOI:  
662 10.21548/31-2-1409
- 663 Jacobs, K., Bergdahl, D.R., Wingfield, M.J., Halik, S., Seifert, K.A., Bright, D.E., Wingfield,  
664 B.D., 2004. *Leptographium wingfieldii* introduced into North America and found  
665 associated with exotic *Tomicus piniperda* and native bark beetles. *Mycol. Res.* 108, 411–  
666 418. <https://doi.org/10.1017/S0953756204009748>
- 667 John, S., Wicks, T.J., Hunt, J.S., Lorimer, M.F., Oakey, H., Scott, E.S., 2005. Protection of  
668 grapevine pruning wounds from infection by *Eutypa lata* using *Trichoderma harzianum*  
669 and *Fusarium lateritium*. *Australas. Plant Pathol.* 34, 569-575.  
670 <https://doi.org/10.1071/AP05075>
- 671 Kaplan, J., Travadon, R., Cooper, M., Hillis, V., Lubell, M., Baumgartner, K., 2016. Identifying  
672 economic hurdles to early adoption of preventative practices: The case of trunk diseases  
673 in California winegrape vineyards. *Wine Econ. Pol.* 5, 127-141. DOI:  
674 10.1016/j.wep.2016.11.001
- 675 Kotze, C., Van Niekerk, J., Mostert, L., Halleen, F., Fourie, P., 2011. Evaluation of biocontrol  
676 agents for grapevine pruning wound protection against trunk pathogen infection.  
677 *Phytopathol. Mediterr.* 50, S247-S263. DOI:10.14601/Phytopathol\_Mediterr-8960
- 678 Kühn, A., Zappata, A., Gold, R.E., Zito, R., Kortekamp, A., 2017. Susceptibility of grape  
679 pruning wounds to grapevine trunk diseases and effectiveness of a new BASF wound  
680 protectant. *Phytopathol. Mediterr.* 56, 536. DOI: 10.14601/Phytopathol\_Mediterr-21865
- 681 Kuntzmann, P., Villaume, S., Bertsch, C., 2009. Conidia dispersal of *Diplodia species* in a  
682 French vineyard. *Phytopathol. Mediterr.* 48, 150-154.  
683 DOI:10.14601/Phytopathol\_Mediterr-2885
- 684 Larignon, P., Darné, G., Ménard, E., Desaché, F., Dubos, B., 2008. Comment agissait l'arsénite  
685 de sodium sur l'esca de la vigne? *Prog. Agric. Vitic.* 125, 642-651.
- 686 Larignon, P., Dubos, B., 2000. Preliminary studies on the biology of *Phaeoacremonium*.  
687 *Phytopathol. Mediterr.* 39, 184-189. DOI: 10.14601/Phytopathol\_Mediterr-1554
- 688 Larignon, P., Fulchic, R., Laurent, C., Dubos, B., 2001. Observation on black dead arm in  
689 French vineyards. *Phytopathol. Mediterr.* 40, S336-S342. DOI:  
690 10.14601/Phytopathol\_Mediterr-1629
- 691 Lecomte, P., Darrietort, G., Liminana, J.-M., Comont, G., Muruamendiaraz, A., Legorburu,  
692 F.-J., Choueiri, E., Jreijiri, F., El Amil, R., Fermaud, M., 2012. New insights into esca of  
693 grapevine: The development of foliar symptoms and their association with xylem  
694 discoloration. *Plant Dis.* 96, 924-934. <http://dx.doi.org/10.1094/PDIS-09-11-0776-RE>
- 695 Lengyel, S., Gold, R.E., Fischer, J., Yemelin, A., Thines, E., Kühn, A., 2019. Early detection

- 696 project - detection and quantification of *Phaeomoniella chlamydospora* and *Botry-*  
697 *osphaeria* spp. in *Vitis vinifera* wood samples. *Phytopathol. Mediterr.* 58, 406-407. DOI:  
698 10.14601/Phytopathol\_Mediterr-10627
- 699 Lorch, W., 2014. Fatal wood disease affects 12 percent of French vineyards. Retrieved 19 May  
700 2020 from [https://www.wine-searcher.com/m/2014/10/fatal-wood-diseases-affect-12-](https://www.wine-searcher.com/m/2014/10/fatal-wood-diseases-affect-12-percent-of-french-vineyards)  
701 [percent-of-french-vineyards](https://www.wine-searcher.com/m/2014/10/fatal-wood-diseases-affect-12-percent-of-french-vineyards)
- 702 Luque, J., Elena, G., Garcia-Figueres, F., Reyes, J., Barrios, G., Legorburu, F.J., 2014. Natural  
703 infections of pruning wounds by fungal trunk pathogens in mature grapevines in Catalonia  
704 (Northeast Spain). *Aust. J. Grape Wine Res.* 20, 134-143. DOI: 10.1111/ajgw.12046
- 705 Luque, J., Martos, S., Aroca, A., Raposo, R., Garcia-Figueres, F., 2009. Symptoms and fungi  
706 associated with declining mature grapevine plants in northeast Spain. *J. Plant Pathol.* 91,  
707 381-90. DOI: 10.4454/jpp.v91i2.968
- 708 MAPA, 2020. Official Registry of Phytosanitary Products. Ministerio de Agricultura, Pesca y  
709 Alimentación, Spain. Consulted on 13 January 2020 from  
710 [https://www.mapa.gob.es/es/agricultura/temas/sanidad-vegetal/productos-](https://www.mapa.gob.es/es/agricultura/temas/sanidad-vegetal/productos-fitosanitarios/registro/menu.asp)  
711 [fitosanitarios/registro/menu.asp](https://www.mapa.gob.es/es/agricultura/temas/sanidad-vegetal/productos-fitosanitarios/registro/menu.asp)
- 712 Martínez-Diz, M.P., Díaz-Losada, E., Barajas, E., Ruano-Rosa, D., Andrés-Sodupe, M.,  
713 Gramaje, D., 2019. Screening of Spanish *Vitis vinifera* germplasm for resistance to  
714 *Phaeomoniella chlamydospora*. *Scient. Hortic.* 246, 104-109.  
715 <https://doi.org/10.1016/j.scienta.2018.10.049>
- 716 Martínez-Diz, M.P., Díaz-Losada, E., Andrés-Sodupe, M., Bujanda, R., Maldonado-González,  
717 M.M., Ojeda, S., Yacoub, A., Rey, P., Gramaje, D., 2020a. Field evaluation of biocontrol  
718 agents against black-foot and Petri diseases of grapevine (under review. *BioRxiv* doi:  
719 <https://doi.org/10.1101/2020.05.19.101568>).
- 720 Martínez-Diz, M.P., Eichmeier, A., Spetik, M., Bujanda, R., Díaz-Fernández, A., Díaz-Losada,  
721 E., Gramaje, D., 2020b. Grapevine pruning time affects natural wound colonization by  
722 wood-invading fungi. (under review. *BioRxiv* doi:  
723 <https://doi.org/10.1101/2020.04.20.050955>).
- 724 Mayet, V., Lecomte, P., 2014. Un nouveau moyen de protection des blessures de taille. *Union*  
725 *Girondine des vins de Bordeaux.* Février 2014, 55-56.
- 726 Milholland R.D., 1991. Muscadine grapes: Some important diseases and their control. *Plant*  
727 *Dis.* 75, 113–117.
- 728 Moller, W.J., Ramos, D.E., Sanborn, R.R., 1977. *Eutypa dieback* in California apricot orchards:  
729 Chemical control studies. *Plant Dis. Rep.* 61, 600-604.
- 730 Mondello, V., Songy, A., Battiston, E., Pinto, C., Coppin, C., Trotel-Aziz, P., Fontaine, F.,  
731 2018. Grapevine trunk diseases: a review of fifteen years of trials for their control with  
732 chemicals and biocontrol agents. *Plant Dis.* 7, 1189-1217. [https://doi.org/10.1094/PDIS-](https://doi.org/10.1094/PDIS-08-17-1181-FE)  
733 [08-17-1181-FE](https://doi.org/10.1094/PDIS-08-17-1181-FE)
- 734 Mondello, V., Spagnolo, A., Larignon, P., Clément, C., Fontaine, F., 2019. Phytoprotection  
735 potential of *Fusarium proliferatum* for control of *Botryosphaeria dieback* pathogens in  
736 grapevine. *Phytopathol. Mediterr.* 58, 293-306. DOI: 10.14601/Phytopathol\_Mediterr-  
737 10617
- 738 Mostert, L., Groenewald, J.Z., Summerbell, R.C., Gams, W., Crous, P.W., 2006. Taxonomy  
739 and pathology of *Togninia (Diaporthales)* and its *Phaeoacremonium* anamorphs. *Stud.*  
740 *Mycol.* 54, 1-115. <https://doi.org/10.3114/sim.54.1.1>
- 741 Mounier, E., Cortes, F., Cadiou, M., Pajot, E., 2014. The benefits of *Trichoderma atroviride*  
742 I-1237 for the protection of grapevines against trunk diseases: from the nursery to the  
743 vineyard. *Phytopathol. Mediterr.* 53, 591-592. DOI: 10.14601/Phytopathol\_Mediterr-  
744 15167
- 745 Moyo, P., Allsopp, E., Roets, F., Mostert, L., Halleen, F., 2014. Arthropods vector grapevine

- 746 trunk disease pathogens. *Phytopathology* 104, 1063-1069. DOI: 10.1094/PHYTO-11-13-  
747 0303-R
- 748 Munkvold, G.P., Marois, J.J., 1993. Efficacy of natural epiphytes and colonisers of grapevine  
749 pruning wounds for biological control of *Eutypa dieback*. *Phytopathology* 83, 624-629.  
750 DOI: 10.1094/Phyto-83-624
- 751 Munkvold, G.P., Marois, J.J., 1995. Factors associated with variation in susceptibility of  
752 grapevine pruning wounds to infection by *Eutypa lata*. *Phytopathology* 85, 249-256. DOI:  
753 10.1094/Phyto-85-249
- 754 Mutawila, C., Fourie, P.H., Halleen, F., Mostert, L., 2011a. Histo-pathology study of the growth  
755 of *Trichoderma harzianum*, *Phaeoconiella chlamydospora* and *Eutypa lata* on grapevine  
756 pruning wounds. *Phytopathol. Mediterr.* 50, S46-S60. DOI:  
757 10.14601/Phytopathol\_Mediterr-8643
- 758 Mutawila, C., Fourie, P.H., Halleen, F., Mostert, L., 2011b. Grapevine cultivar variation to  
759 pruning wound protection by *Trichoderma* species against trunk pathogens. *Phytopathol.*  
760 *Mediterr.* 50, S264–S276. DOI: 10.14601/Phytopathol\_Mediterr-8981
- 761 Mutawila, C., Halleen, F., Mostert, L., 2015. Development of benzimidazole resistant  
762 *Trichoderma* strains for the integration of chemical and biocontrol methods of grapevine  
763 pruning wound protection. *BioControl* 60, 387-399. <https://doi.org/10.1007/s10526-014-9647-y>  
764
- 765 Mutawila, C., Halleen, F., Mostert, L., 2016. Optimisation of time of application of  
766 *Trichoderma* biocontrol agents for protection of grapevine pruning wounds. *Aust. J. Grape*  
767 *Wine Res.* 22, 279-287. <https://doi.org/10.1111/ajgw.12218>
- 768 Niem, J.M., Billones-Baaijens, R., Stodart, B., Savocchia, S., 2020. Diversity Profiling of  
769 Grapevine Microbial Endosphere and Antagonistic Potential of Endophytic *Pseudomonas*  
770 Against Grapevine Trunk Diseases. *Front. Microbiol.* 11, 477. DOI:  
771 10.3389/fmicb.2020.00477
- 772 Pertot, I., Caffi, T., Rossi, V., Mugnai, L., Hoffmann, C., Grando, M.S., Gary, C., Lafond, D.,  
773 Duso, C., Thiery, D., Mazzoni, V., Anfora, G., 2017. A critical review of plant protection  
774 tools for reducing pesticide use on grapevine and new perspectives for the implementation  
775 of IPM in viticulture. *Crop Prot.* 97, 70-84. <https://doi.org/10.1016/j.cropro.2016.11.025>
- 776 Pertot, I., Prodorutti, D., Colombini, A., Pasini, L., 2016. *Trichoderma atroviride* SC1 prevents  
777 *Phaeoconiella chlamydospora* and *Phaeoacremonium aleophilum* infection of grapevine  
778 plants during the grafting process in nurseries. *Biocontrol* 61, 257-267. DOI:  
779 10.1007/s10526-016-9723-6
- 780 Petzoldt, C.H., Moller, W.J., Sall, M.A., 1981. *Eutypa dieback* of grapevines: seasonal  
781 differences in infection and duration of susceptibility of pruning wounds. *Phytopathology*  
782 71, 540-543.
- 783 Phillips, A.J.L., 2002. *Botryosphaeria* species associated with diseases of grapevines in  
784 Portugal. *Phytopathol. Mediterr.* 41, 3-18. DOI: 10.14601/Phytopathol\_Mediterr-1655
- 785 Phillips, A.J.L., Crous, P.W., Alves, A., 2007. *Diplodia seriata*, the anamorph of  
786 “*Botryosphaeria*” *obtusa*. *Fungal Divers.* 25, 141-155.
- 787 Pitt, W.M., Sosnowski, M.R., Huang, R., Qui, Y., Steel, C.C., Savocchia, S., 2012. Evaluation  
788 of fungicides for the management of of *Botryosphaeria* canker of grapevines. *Plant Dis.*  
789 96, 1303-1308. <https://doi.org/10.1094/PDIS-11-11-0998-RE>
- 790 Pitt, W.M., Trouillas, F.P., Gubler, W.D., Savocchia, S., Sosnowski, M.R., 2013a.  
791 Pathogenicity of diatrypaceous fungi on grapevines in Australia. *Plant Dis.* 97, 749-756.  
792 <https://doi.org/10.1094/PDIS-10-12-0954-RE>
- 793 Pitt, W.M., Úrbez-Torres, J.R., Trouillas, F.P., 2013b. *Dothiorella vidmadera*, a novel species  
794 from grapevines in Australia and notes on *Spencermartinsia*. *Fungal Divers.* 61, 209-219.  
795 <https://doi.org/10.1007/s13225-013-0244-7>



- 796 Pitt, W.M., Úrbez-Torres, J.R., Trouillas, F.P., 2015. *Dothiorella* and *Spencermartinsia*, new  
797 species and records from grapevines in Australia. Aust. Plant Pathol. 44, 43-56.  
798 <https://doi.org/10.1007/s13313-014-0332-5>
- 799 Quaglia, M., Covarelli, L., Zazzerini, A., 2009. Epidemiological survey on esca disease in  
800 Umbria, central Italy. Phytopathol. Mediterr. 48, 84-91. DOI:  
801 10.14601/Phytopathol\_Mediterr-2877
- 802 Reis, P., Letousey, P., Rego, C., 2017. *Trichoderma atroviride* strain I-1237 protects pruning  
803 wounds against grapevine wood pathogens. Phytopathol. Mediterr. 56, 580. DOI:  
804 10.14601/Phytopathol\_Mediterr-21865
- 805 Rezgui, A., Ben Ghnaya-Chakroun, A., Vallance, J., Bruez, E., Hajlaoui, M. R., Sadfi-Zouaoui,  
806 N., Rey, P., 2016. Endophytic bacteria with antagonistic traits inhabit the wood tissues of  
807 grapevines from Tunisian vineyards. Biol. Control 99, 28-37.  
808 <https://doi.org/10.1016/j.biocontrol.2016.04.005>
- 809 Rolshausen, P.E., Akgül, D.S., Perez, R., Eskalen, A., Gispert, C., 2013. First report of wood  
810 canker caused by *Neoscytalidium dimidiatum* on grapevine in California. Plant Dis. 97,  
811 1511. <https://doi.org/10.1094/PDIS-04-13-0451-PDN>
- 812 Rolshausen, P.E., Gubler, W.D., 2005. Use of boron for the control of *Eutypa* dieback of  
813 grapevines. Plant Dis. 89, 734-738. <https://doi.org/10.1094/PD-89-0734>
- 814 Rolshausen, P.E., Úrbez-Torres, J.R., Rooney-Latham, S., Eskalen, A., Smith, R.J., Gubler  
815 W.D., 2010. Evaluation of Pruning Wound Susceptibility and Protection Against Fungi  
816 Associated with Grapevine Trunk Diseases. Am. J. Enol. Vitic. 61, 113-119.
- 817 Romanazzi, G., Murolo, S., Pizzichini, L., Nardi, S., 2009. Esca in young and mature vineyards,  
818 and molecular diagnosis of the associated fungi. Eur. J. Plant Pathol. 125, 277-290.  
819 <https://doi.org/10.1007/s10658-009-9481-8>
- 820 Samaras, A., Ntasioy, P., Testempasis, S., Theocharis, S. Koundouras, S., Karaoglanidis, G.,  
821 2019. Evaluation of the fungicide Tessior (boscalid and pyraclostrobin) for control of  
822 grapevine trunk diseases in Greece. Phytopathol. Mediterr. 58, 421. DOI:  
823 10.14601/Phytopathol\_Mediterr-10627
- 824 Savocchia, S., Steel, C.C., Stodart, B.J., Somers, A., 2007. Pathogenicity of *Botryosphaeria*  
825 species isolated from declining grapevines in sub-tropical regions of eastern Australia.  
826 Vitis 46, 27-32.
- 827 Schubert, M., Fink, F., Schwartze, F.W.M.R., 2008. Evaluation of *Trichoderma* spp. as  
828 biocontrol agent against wood decay fungi in urban trees. Biological Control 45, 111-123.  
829 <https://doi.org/10.1016/j.biocontrol.2008.01.001>
- 830 Serra, S., Mannoni, A.M., Ligios, V., 2008. Studies on the susceptibility of pruning wounds to  
831 infection by fungi involved in grapevine wood diseases in Italy. Phytopathol. Mediterr.  
832 47, 234-246. DOI: 10.14601/Phytopathol\_Mediterr-2727
- 833 Siebert, J.B., 2001. *Eutypa*: the economic toll on vineyards. Wines Vines 4, 50-56.
- 834 Sosnowski, M., McCarthy, G., 2017. Economic impact of grapevine trunk disease management  
835 in Sauvignon Blanc vineyards of New Zealand. Wine Vitic. J. 32, 42-48.
- 836 Sosnowski, M.R., Creaser, M.L., Wicks, T.J., Lardner, R., Scott, E.S., 2008. Protection of  
837 grapevine pruning wounds from infection by *Eutypa lata*. Aust. J. Grape Wine Res. 14,  
838 134-142. DOI: 10.1111/j.1755-0238.2008.00015.x
- 839 Sosnowski, M.R., Loschiavo, A.P., Wicks, T.J., Scott, E.S., 2013. Evaluating treatments and  
840 spray application for the protection of grapevine pruning wounds from infection by *Eutypa*  
841 *lata*. Plant Dis. 97, 1599-1604. <http://dx.doi.org/10.1094/PDIS-02-13-0201-RE>
- 842 Sosnowski, M.R., Mundi, D.C., 2019. Pruning Wound Protection Strategies for Simultaneous  
843 Control of *Eutypa* and *Botryosphaeria* dieback in New Zealand. Plant Dis. 103, 519-525.  
844 <https://doi.org/10.1094/PDIS-05-18-0728-RE>
- 845 Spinosi, J., Févotte, J., Vial, G., 2009. Éléments techniques sur l'exposition professionnelle aux

- 846 pesticides arsenicaux. Matrice cultures - expositions aux pesticides arsenicaux. Institut de  
847 veille sanitaire, Saint-Maurice, France.
- 848 Surico, G., 2009. Towards a redefinition of the diseases within the esca complex of grapevine.  
849 Phytopathol. Mediterr. 48, 5-10. DOI: 10.14601/Phytopathol\_Mediterr-2870
- 850 Tegli, S., Bertelli, E., Surico, G., 2000. Sequence analysis of ITS ribosomal DNA in five  
851 *Phaeoacremonium* species and development of a PCR-based assay for the detection of *P.*  
852 *chlamydosporum* and *P. aleophilum* in grapevine tissue. Phytopathol. Mediterr. 39, 134-  
853 149. DOI: 10.14601/Phytopathol\_Mediterr-1555
- 854 Travadon, R., Lawrence, D.P., Rooney-Latham, S., Gubler, W.D., Wilcox, W.F., Rolshausen,  
855 P.E., Baumgartner, K., 2015. *Cadophora* species associated with wood-decay of grapevine  
856 in North America. Fungal Biol. 119, 53-66. <https://doi.org/10.1016/j.funbio.2014.11.002>
- 857 Trotel-Aziz, P., Abou-Mansour, E., Courteaux, B., Rabenoelina, F., Clément, C., Fontaine, F.,  
858 Aziz, A., 2019. *Bacillus subtilis* PTA-271 Counteracts Botryosphaeria Dieback in  
859 Grapevine, Triggering Immune Responses and Detoxification of Fungal Phytotoxins.  
860 Front. Plant Sci. 10, 25. DOI: 10.3389/fpls.2019.00025
- 861 Úrbez-Torres, J.R., 2011. The status of Botryosphaeriaceae species infecting grapevines.  
862 Phytopathol. Mediterr. 50, S5-S45. DOI: 10.14601/Phytopathol\_Mediterr-9316
- 863 Úrbez-Torres, J.R., Battany, M., Bettiga, L.J., Gispert, C., McGourty, G., Roncoroni, J., Smith,  
864 R.J., Verdegaaal, P., Gubler, W.D., 2010. Botryosphaeriaceae species spore-trapping  
865 studies in California Vineyards. Plant Dis. 94, 717-724. [https://doi.org/10.1094/PDIS-94-  
866 6-0717](https://doi.org/10.1094/PDIS-94-6-0717)
- 867 Úrbez-Torres, J.R., Gubler, W.D., 2011. Susceptibility of grapevine pruning wounds to  
868 infection by *Lasiodiplodia theobromae* and *Neofusicoccum parvum*. Plant Pathol. 60, 261-  
869 270. <https://doi.org/10.1111/j.1365-3059.2010.02381.x>
- 870 Úrbez-Torres, J.R., Leavitt, G.M., Guerrero, J.C., Guevara, J., Gubler, W.D., 2008.  
871 Identification and pathogenicity of *Lasiodiplodia theobromae* and *Diplodia seriata*, the  
872 causal agents of Bot canker disease of grapevines in Mexico. Plant Dis. 92, 519-529.  
873 <https://doi.org/10.1094/PDIS-92-4-0519>
- 874 Valencia, D., Torres, C., Camps, R., Lopez, E., Celis-Diez, J., Beosain, X., 2015. Dissemination  
875 of Botryosphaeriaceae conidia in vineyards in the semiarid Mediterranean climate of the  
876 Valparaíso Region of Chile. Phytopathol. Mediterr. 54, 394-402. DOI:  
877 10.14601/Phytopathol\_Mediterr-16055
- 878 van Niekerk, J.M., Calitz, F.J., Halleen, F., Fourie, P.H., 2010. Temporal spore dispersal  
879 patterns of grapevine trunk pathogens in South Africa. Eur. J. Plant. Pathol. 127, 375-390.  
880 <https://doi.org/10.1007/s10658-010-9604-2>
- 881 van Niekerk, J.M., Crous, P.W., Groenewald, J.Z., Fourie, P.H., Halleen, F., 2004. DNA  
882 phylogeny, morphology and pathogenicity of *Botryosphaeria* species on grapevines.  
883 Mycologia 96, 781-798. DOI: 10.2307/3762112
- 884 Yan, J.-Y., Xie, Y., Zhang, W., Wang, Y., Liu, J.-K., Hyde, K.D., Seem, R.C., Zhang, G. Z.,  
885 Wang, Z.-Y., Yao, S.-W., Bai, X.-J., Dissanayake, A. J., Peng, Y.-L., Li, X.-H., 2013.  
886 Species of Botryosphaeriaceae involved in grapevine dieback in China. Fungal Divers. 61,  
887 221-236. <https://doi.org/10.1007/s13225-013-0251-8>
- 888 Yang, T., Groenewald, J.Z., Cheewangkoon, R., Jami, F., Abdollahzadeh, J., Lombard, L.,  
889 Crous, P.W., 2017. Families, genera, and species of *Botryosphaeriales*. Fungal Biol. 121,  
890 322-346. <https://doi.org/10.1016/j.funbio.2016.11.001>

**Table 1.** Pruning wound treatments evaluated for control of *Diplodia seriata* and *Phaeomoniella chlamydospora* under field conditions.

| Trade name    | Nature           | Chemical/Biological group <sup>a</sup>                                            | Active ingredient                                                             | Application rate      | Supplier                               |
|---------------|------------------|-----------------------------------------------------------------------------------|-------------------------------------------------------------------------------|-----------------------|----------------------------------------|
| Enovit Metil  | Chemical         | MBC <sup>b</sup> / Thiophanates                                                   | Thiophanate methyl 70%                                                        | 1 g L <sup>-1</sup>   | Sipcam Inagra S.L.                     |
| Tessor        | Chemical         | QoI <sup>c</sup> / methoxy-carbamates + SDHI <sup>d</sup> / pyridine-carboxamides | Pyraclostrobin 0.5% + boscalid 1%                                             | n/a <sup>*</sup>      | BASF Española S.L.U.                   |
| Master + Song | Paste + chemical | DMI <sup>e</sup> / Triazoles                                                      | Paste (resin 55% + vegetal oil and healing substances 45%) + tebuconazole 25% | n/a                   | Sipcam Jardin S.L.+ Sipcam Iberia S.L. |
| Vintec        | BCA <sup>f</sup> | Microbial (fungi)                                                                 | <i>Trichoderma atroviride</i> SC1 (2 x 10 <sup>10</sup> CFU g <sup>-1</sup> ) | 2 g L <sup>-1</sup>   | Belchim Crop Protection España S.A.    |
| Esquive       | BCA              | Microbial (fungi)                                                                 | <i>T. atroviride</i> I-1237 (1 x 10 <sup>8</sup> CFU g <sup>-1</sup> )        | 100 g L <sup>-1</sup> | Idai Nature S.L.                       |

<sup>a</sup> According to Fungicide Resistance Action Committee (FRAC) Code List<sup>®</sup> (2020): Fungal control agents sorted by cross resistance pattern and mode of action ([https://www.frac.info/docs/default-source/publications/frac-code-list/frac-code-list-2020-final.pdf?sfvrsn=8301499a\\_2](https://www.frac.info/docs/default-source/publications/frac-code-list/frac-code-list-2020-final.pdf?sfvrsn=8301499a_2))

<sup>b</sup> MBC, Methyl Benzimidazole Carbamates

<sup>c</sup> QoI, Quinone outside Inhibitors

<sup>d</sup> SDHI, Succinate-dehydrogenase Inhibitors

<sup>e</sup> DMI, Demethylation Inhibitors

<sup>f</sup> BCA, Biological Control Agent

<sup>\*</sup> n/a, not applicable



**Table 2.** Efficacy of wound treatments when applied 24 h before inoculation with *Diplodia seriata* in two growing seasons.

| Trade name    | Active ingredient                                                             | Growing season   |                   |           |      |
|---------------|-------------------------------------------------------------------------------|------------------|-------------------|-----------|------|
|               |                                                                               | 2018/2019        |                   | 2019/2020 |      |
|               |                                                                               | MPR <sup>a</sup> | MPDC <sup>b</sup> | MPR       | MPDC |
|               | Inoculated control (IC)                                                       | 58 a             | -                 | 68 a      | -    |
| Vintec        | <i>T. atroviride</i> SC1                                                      | 52 a             | 10                | 53 ab     | 22   |
| Esquive       | <i>T. atroviride</i> I-1237                                                   | 43 a             | 26                | 46 ab     | 32   |
| Master + Song | Paste (resin 55% + vegetal oil and healing substances 45%) + tebuconazole 25% | 14 b             | 76                | 38 bc     | 44   |
| Enovit Metil  | Thiophanate methyl 70 %                                                       | 6 b              | 90                | 31 bc     | 54   |
| Tessor        | Pyraclostrobin 0.5% + boscalid 1%                                             | 3 b              | 95                | 21 c      | 69   |

<sup>a</sup> Efficacy was based on the mean percent recovery (MPR) of *Diplodia seriata* from the treated canes by traditional isolation.

<sup>b</sup> Mean percent disease control (MPDC) of treatments was calculated as the reduction in MPR as a proportion of the inoculated control.

**Table 3.** Efficacy of wound treatments when applied 24 h before inoculation with *Phaeoconiella chlamydospora*.

| Trade name    | Active ingredient                                                             | MPR <sup>a</sup> | MPDC <sup>b</sup> |
|---------------|-------------------------------------------------------------------------------|------------------|-------------------|
|               | Inoculated control (IC)                                                       | 36 ab            | -                 |
| Vintec        | <i>T. atroviride</i> SC1                                                      | 45 a             | 0                 |
| Esquive       | <i>T. atroviride</i> I-1237                                                   | 30 ab            | 17                |
| Enovit Metil  | Thiophanate methyl 70%                                                        | 19 bc            | 46                |
| Tessor        | Pyraclostrobin 0.5% + boscalid 1%                                             | 18 c             | 51                |
| Master + Song | Paste (resin 55% + vegetal oil and healing substances 45%) + tebuconazole 25% | 12 c             | 67                |

<sup>a</sup> Efficacy was based on the mean percent recovery (MPR) of *Phaeoconiella chlamydospora* from the treated canes by traditional isolation.

<sup>b</sup> Mean percent disease control (MPDC) of treatments was calculated as the reduction in MPR as a proportion of the inoculated control.
